# Supplementary material for: Identification of Novel Toxin Genes from the Stinging Nettle Caterpillar Parasa lepida (Cramer, 1799): Insights into the Evolution of Lepidoptera Toxins
Source: MDPI journal article supplement (doi:10.3390/insects12050396), 2021-04-29
Supplement: s1 [file s1]

### Supplementary data A5

Parameters setting used in transcriptomic analyses

| No. | Programs            | Parameters                                                                                                                                  |
|-----|---------------------|---------------------------------------------------------------------------------------------------------------------------------------------|
| 1   | Trinity v2.0.6      | --min_contig_length 150 --CPU 8 --min_kmer_cov 3 --min_glue 3 --bfly_opts '-V 5 --edge-thr=0.1 --stderr'                                    |
| 2   | Tgicl v2.0.6        | -l 40 -c 10 -v 25 -O '-repeat_stringency 0.95 -minmatch 35 -minscore 35'                                                                    |
| 3   | Blast2GO v2.5.0     | default                                                                                                                                     |
| 4   | TransDecoder v3.0.1 | default                                                                                                                                     |
| 5   | Bowtie2 v2.2.5      | -q --phred33 --sensitive --dpad 0 --gbar 999999999 --mp 1,1 --np 1 --score-min L,0,-0.1 -I 1 -X 1000 --no-mixed --no-discordant -p 1 -k 200 |
| 6   | RSEM v1.2.12        | default                                                                                                                                     |
